# Supplementary material for: Occurrence rate and risk factors for acute kidney injury after lung transplantation: a systematic review and meta-analysis
Source: PeerJ. 2025 Feb 21;13:e18364. doi: 10.7717/peerj.18364 (PMC11849521; doi:10.7717/peerj.18364)
Supplement: Supplemental Information 4 [file peerj-13-18364-s004.xlsx]

## Sheet: OR
Age						BMI						Male sex						Lung allocation score						Creatinine, mg/Dl						eGFR, mL/min						Cystic fibrosis						Diabetes						Hypertension
study	year	or	lci	uci		study	year	or	lci	uci		study	year	or	lci	uci		study	year	or	lci	uci		study	year	or	lci	uci		study	year	or	lci	uci		study	year	or	lci	uci		study	year	or	lci	uci		study	year
24-Lu	2023	0.936	0.841	1.041		23-Liu	2021	0.161	0.003	8.017		27-Fidalgo	2014	1.21	0.74	1.98		27-Fidalgo	2014	1.038	0.997	1.081		31-Shuai	2020	1.01	0.96	1.063		22-Du	2021	1.01	1	1.03		27-Fidalgo	2014	2.13	0.81	5.62		27-Fidalgo	2014	1.08	0.42	2.82		25-Xue	2014
27-Fidalgo	2014	1.03	1	1.07		24-Lu	2023	0.71	0.529	0.964		28-Scaravilli	2022	0.36	0.14	0.92														27-Fidalgo	2014	1.01	0.99	1.02		18-Sikma	2017	2.17	1.16	4.06		28-Scaravilli	2022	0.84	0.34	2.09
30-Atchade	2020	1	0.98	1.07																										32-Rocha	2005	0.98	0.96	0.99
31-Shuai	2020	1	0.953	1.155
[truncated: 43 more columns]

## Sheet: HR
Age						Lung allocation score						Creatinine, mg/Dl						eGFR, mL/min						Pulmonary hypertension before surgery						Diabetes						Hypertension						Intraoperative support Cardiopulmonary bypass						Intra-op ECMO
study	year	hr	lci	uci		study	year	hr	lci	uci		study	year	hr	lci	uci		study	year	hr	lci	uci		study	year	hr	lci	uci		study	year	hr	lci	uci		study	year	hr	lci	uci		study	year	hr	lci	uci		study	year
19-Kim	2021	1.092	1.051	1.135		16-Chan	2023	1.01	0.99	1.02		16-Chan	2023	5.15	2.44	11.9		16-Chan	2023	0.99	0.98	1		16-Chan	2023	0.65	0.25	1.63		16-Chan	2023	1.19	0.66	2.16		16-Chan	2023	1.12	0.74	1.67		16-Chan	2023	1.34	0.82	2.18		16-Chan	2023
																								21-Jing	2021	2.43	1.04	5.66
[truncated: 13 more columns]
